# Supplementary material for: Menstrual pain and psychosocial wellbeing among adolescent girls in Hohoe, Ghana
Source: Research Square preprint supplement (doi:10.21203/rs.3.rs-7075276/v1), 2025-09-08
Supplement: Supplementary file 1 [file 22247f412acc43d8112ed518.docx]

**Supplementary files**

**S1 Table: Strengths and difficulties frequency distribution**

| **Statement** | **Response, N (%)** | | |
| --- | --- | --- | --- |
| **Not true** | **Somewhat true** | **Certainly true** |
| **Prosocial scale** | | | |
| I try to be nice to other people | 11 (11.2) | 23 (23.5) | 64 (65.3) |
| I usually share with others | 22 (22.4) | 18 (18.4) | 58 (59.2) |
| I am helpful if someone is hurt, upset or feeling ill | 8 (8.2) | 18 (18.4) | 72 (73.5) |
| I am kind to younger children | 9 (9.2) | 17 (17.3) | 72 (73.5) |
| I often volunteer to help others | 3 (3.1) | 18 (18.4) | 77 (78.6) |
| **Hyperactivity scale** | | | |
| I am restless, I cannot stay still for long | 39 (39.8) | 30 (30.6) | 29 (29.6) |
| I am constantly fidgeting or squirming | 39 (39.8) | 39 (39.8) | 20 (20.4) |
| I am easily distracted, I find it difficult to concentrate | 33 (33.7) | 32 (32.6) | 33 (33.7) |
| I think before I do things | 7 (7.1) | 23 (23.5) | 68 (69.4) |
| I finish the work I'm doing, my attention is good | 6 (6.2) | 31 (32.0) | 60 (61.9) |
| **Emotional scale** | | | |
| I get a lot of headaches, stomach-aches or sickness | 37 (37.8) | 20 (20.4) | 41 (41.8) |
| I worry a lot | 46 (46.9) | 20 (20.4) | 32 (32.7) |
| I am often unhappy, down-hearted or tearful | 28 (28.6) | 42 (42.9) | 28 (28.6) |
| I am nervous in new situations | 33 (33.7) | 29 (29.6) | 36 (36.7) |
| I have many fears, I am easily scared | 27 (27.5) | 33 (33.7) | 38 (38.8) |
| **Conduct Problem scale** | | | |
| I get very angry and often lose my temper | 44 (44.9) | 23 (23.5) | 31 (31.6) |
| I usually do as I am told | 7 (7.1) | 18 (18.4) | 73 (74.5) |
| I fight a lot. I can make other people do what I want | 64 (65.3) | 23 (23.5) | 11 (11.2) |
| I am often accused of lying or cheating | 59 (60.2) | 18 (18.4) | 21 (21.4) |
| I take things that are not mine from home, school or elsewhere | 71 (72.4) | 17 (17.4) | 10 (10.2) |
| **Peer Problem scale** | | | |
| I am usually on my own. I generally play alone or keep to myself | 46 (46.9) | 19 (19.4) | 33 (33.7) |
| I have one good friend or more | 13 (13.3) | 11 (11.2) | 74 (75.5) |
| Other people my age generally like me | 8 (8.2) | 43 (43.9) | 47 (48.0) |
| Other children or young people pick on me or bully me | 61 (62.2) | 21 (21.4) | 16 (16.3) |
| I get on better with adults than with people my own age | 44 (44.9) | 32 (32.6) | 22 (22.5) |
